# Supplementary material for: Inferring 3D chromatin structure using a multiscale approach based on quaternions
Source: PubMed Central journal article supplement (PMC4518643; doi:10.1186/s12859-015-0667-0), 2015-07-29

# Inferring 3D chromatin structure using a multiscale approach based on quaternions – Supplementary Material

Claudia Caudai, Emanuele Salerno, Monica Zoppè and Anna Tonazzini

Data for a 30 Mbp stretch of Chromosome 1, long arm, from lymphoblastoid cell line GM06990 were retrieved for both the Hi-C [8] and the expression experiments (ENCODE). Two stretches of about 3.5 Mbp were selected as representative of, respectively, highly and poorly expressed genomic regions (see figure below):

Highly expressed: from q = 153.3 Mbp to q = 156.8 Mbp,

Poorly expressed: from q = 162 Mbp to q = 165.5 Mbp.

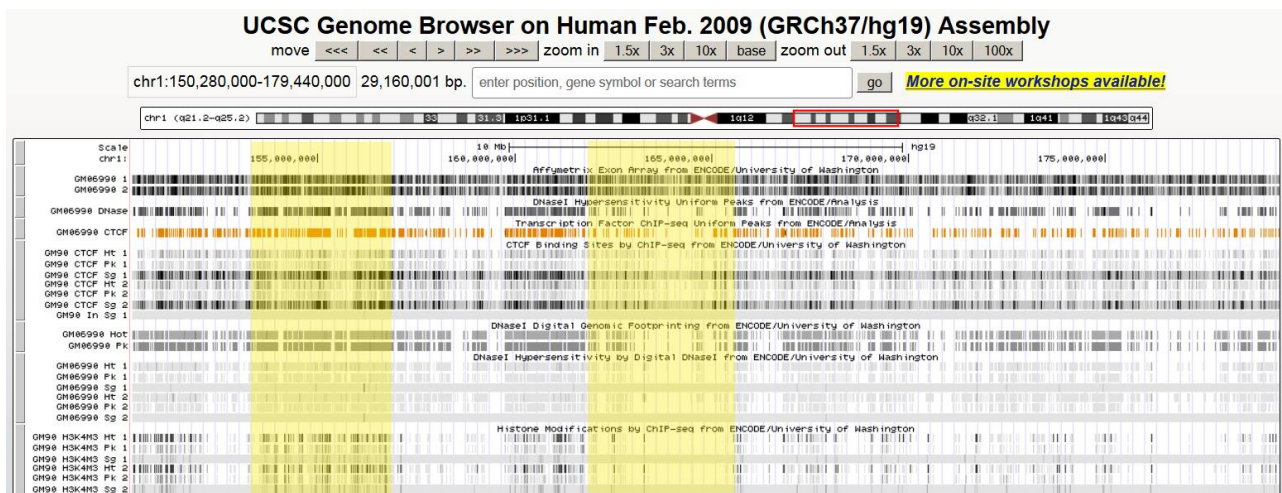

Applying our algorithm we obtained 40 configurations. For each configuration, we calculated the mean-square Euclidean distances between pairs of loci as functions of their genomic distance in the high and low expression regions (see Fig. 4 of main text). The ratio  $\rho$  between the integral of the functions obtained for the two regions is reported in Table 1.

Two clusters were identified, defined by the threshold value  $\rho = 2$ . Those with  $\rho > 2$  (meaning that the span of the highly expressed region is at least twice as much as the poorly expressed counterpart) show a peculiar pear-like shape, clearly recognizable in the plots below.

**Table 1: Ratios  $\rho$  of the 40 configurations**

| <b>Configuration</b> | <b>Ratio <math>\rho</math></b> |
|----------------------|--------------------------------|
| 1                    | 1.99                           |
| 2                    | 1.03                           |
| 3                    | 1.13                           |
| 4                    | 1.72                           |
| <b>5</b>             | <b>2.51</b>                    |
| 6                    | 0.89                           |
| <b>7</b>             | <b>5.66</b>                    |
| <b>8</b>             | <b>3.36</b>                    |
| 9                    | 1.19                           |
| 10                   | 0.85                           |
| 11                   | 1.15                           |
| 12                   | 1.89                           |
| <b>13</b>            | <b>2.41</b>                    |
| <b>14</b>            | <b>2.92</b>                    |
| <b>15</b>            | <b>3.28</b>                    |
| 16                   | 1.37                           |
| <b>17</b>            | <b>3.03</b>                    |
| <b>18</b>            | <b>2.46</b>                    |
| 19                   | 0.64                           |
| 20                   | 0.47                           |
| 21                   | 0.69                           |
| 22                   | 1.11                           |
| 23                   | 0.63                           |
| <b>24</b>            | <b>3.11</b>                    |
| 25                   | 1.62                           |
| <b>26</b>            | <b>4.02</b>                    |
| <b>27</b>            | <b>2.72</b>                    |
| 28                   | 1.49                           |
| 29                   | 1.34                           |
| <b>30</b>            | <b>3.85</b>                    |
| 31                   | 1.54                           |
| 32                   | 1.82                           |
| 33                   | 0.54                           |
| <b>34</b>            | <b>2.26</b>                    |
| 35                   | 1.73                           |
| <b>36</b>            | <b>2.72</b>                    |
| 37                   | 1.19                           |
| <b>38</b>            | <b>2.49</b>                    |
| 39                   | 0.92                           |
| <b>40</b>            | <b>4.05</b>                    |

Final configurations with  $\rho > 2$ , “pear like” conformation (5-7-8-13-14-15-17-18-24-26-27-30-34-36-38-40):

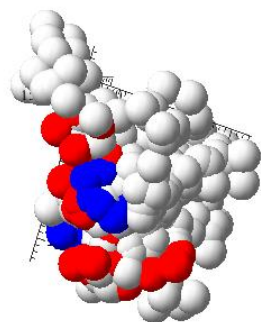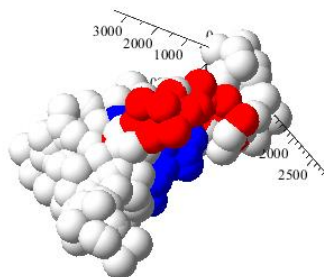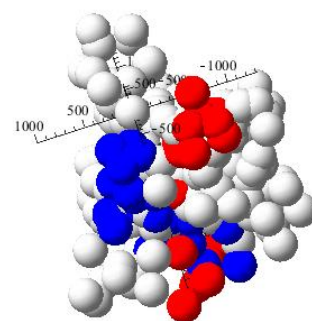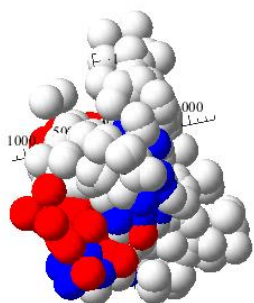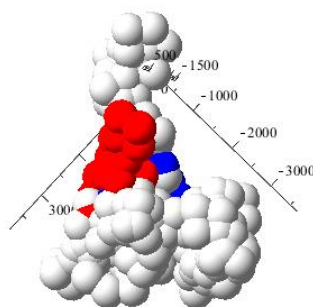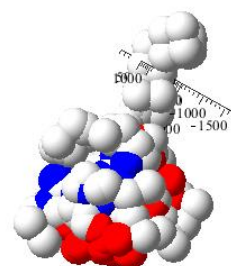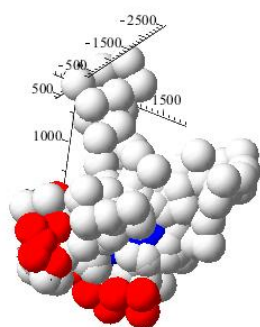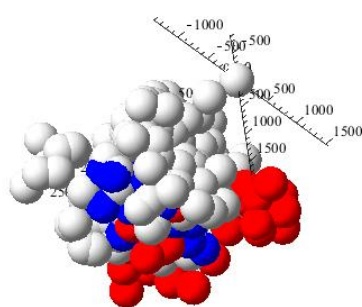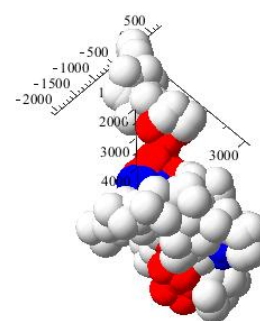

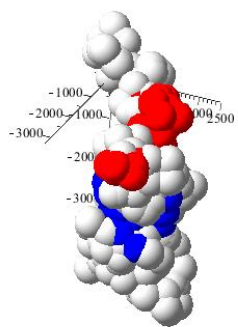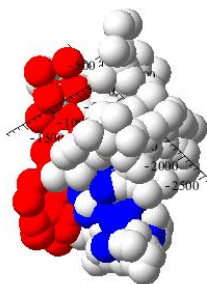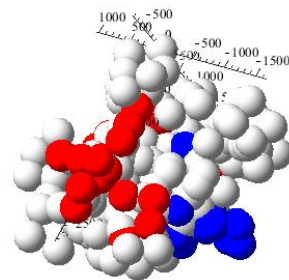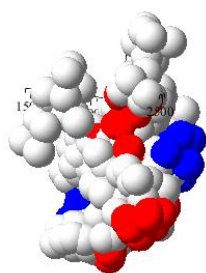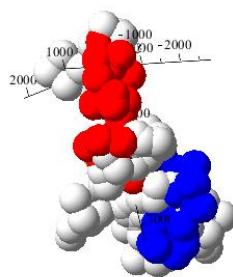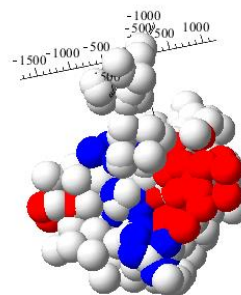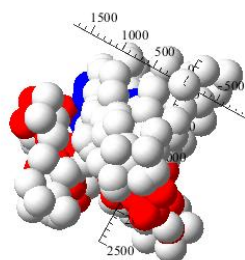

Final configurations with  $\rho < 2$ , “globular” conformation (1-2-3-4-6-9-10-11-12-16-19-20-21-22-23-25-28-29-31-32-33-35-37-39):

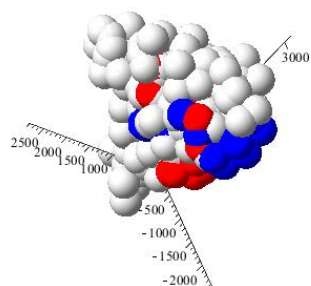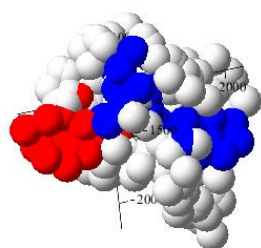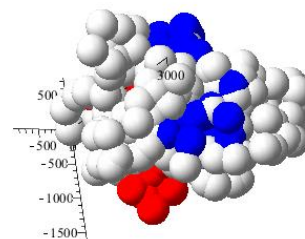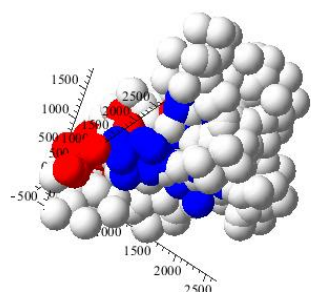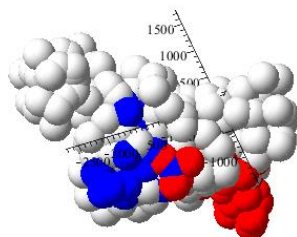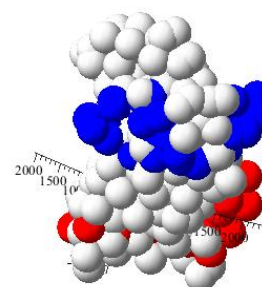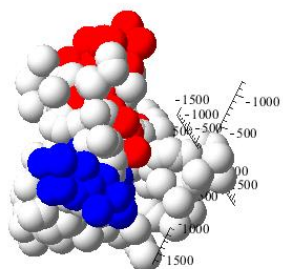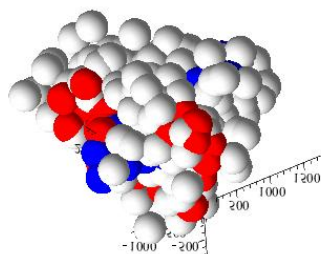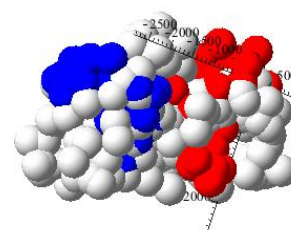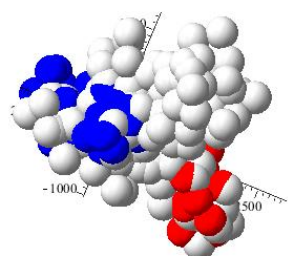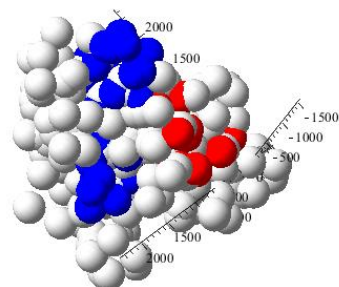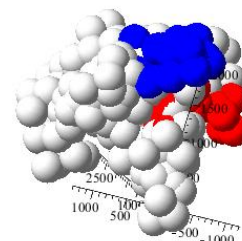

Supplement: 12859_2015_667_MOESM5_ESM.pdf [file 12859_2015_667_MOESM5_ESM.pdf]
